# Supplementary material for: BRCA2 abrogation triggers innate immune responses potentiated by treatment with PARP inhibitors
Source: PubMed Central journal article supplement (PMC6637138; doi:10.1038/s41467-019-11048-5), 2019-07-17
Supplement: 41467_2019_11048_MOESM1_ESM.pdf [file 41467_2019_11048_MOESM1_ESM.pdf]

## **Supplementary Information**

**BRCA2 abrogation triggers innate immune responses  
potentiated by treatment with PARP inhibitors**

**Reisländer *et al.***

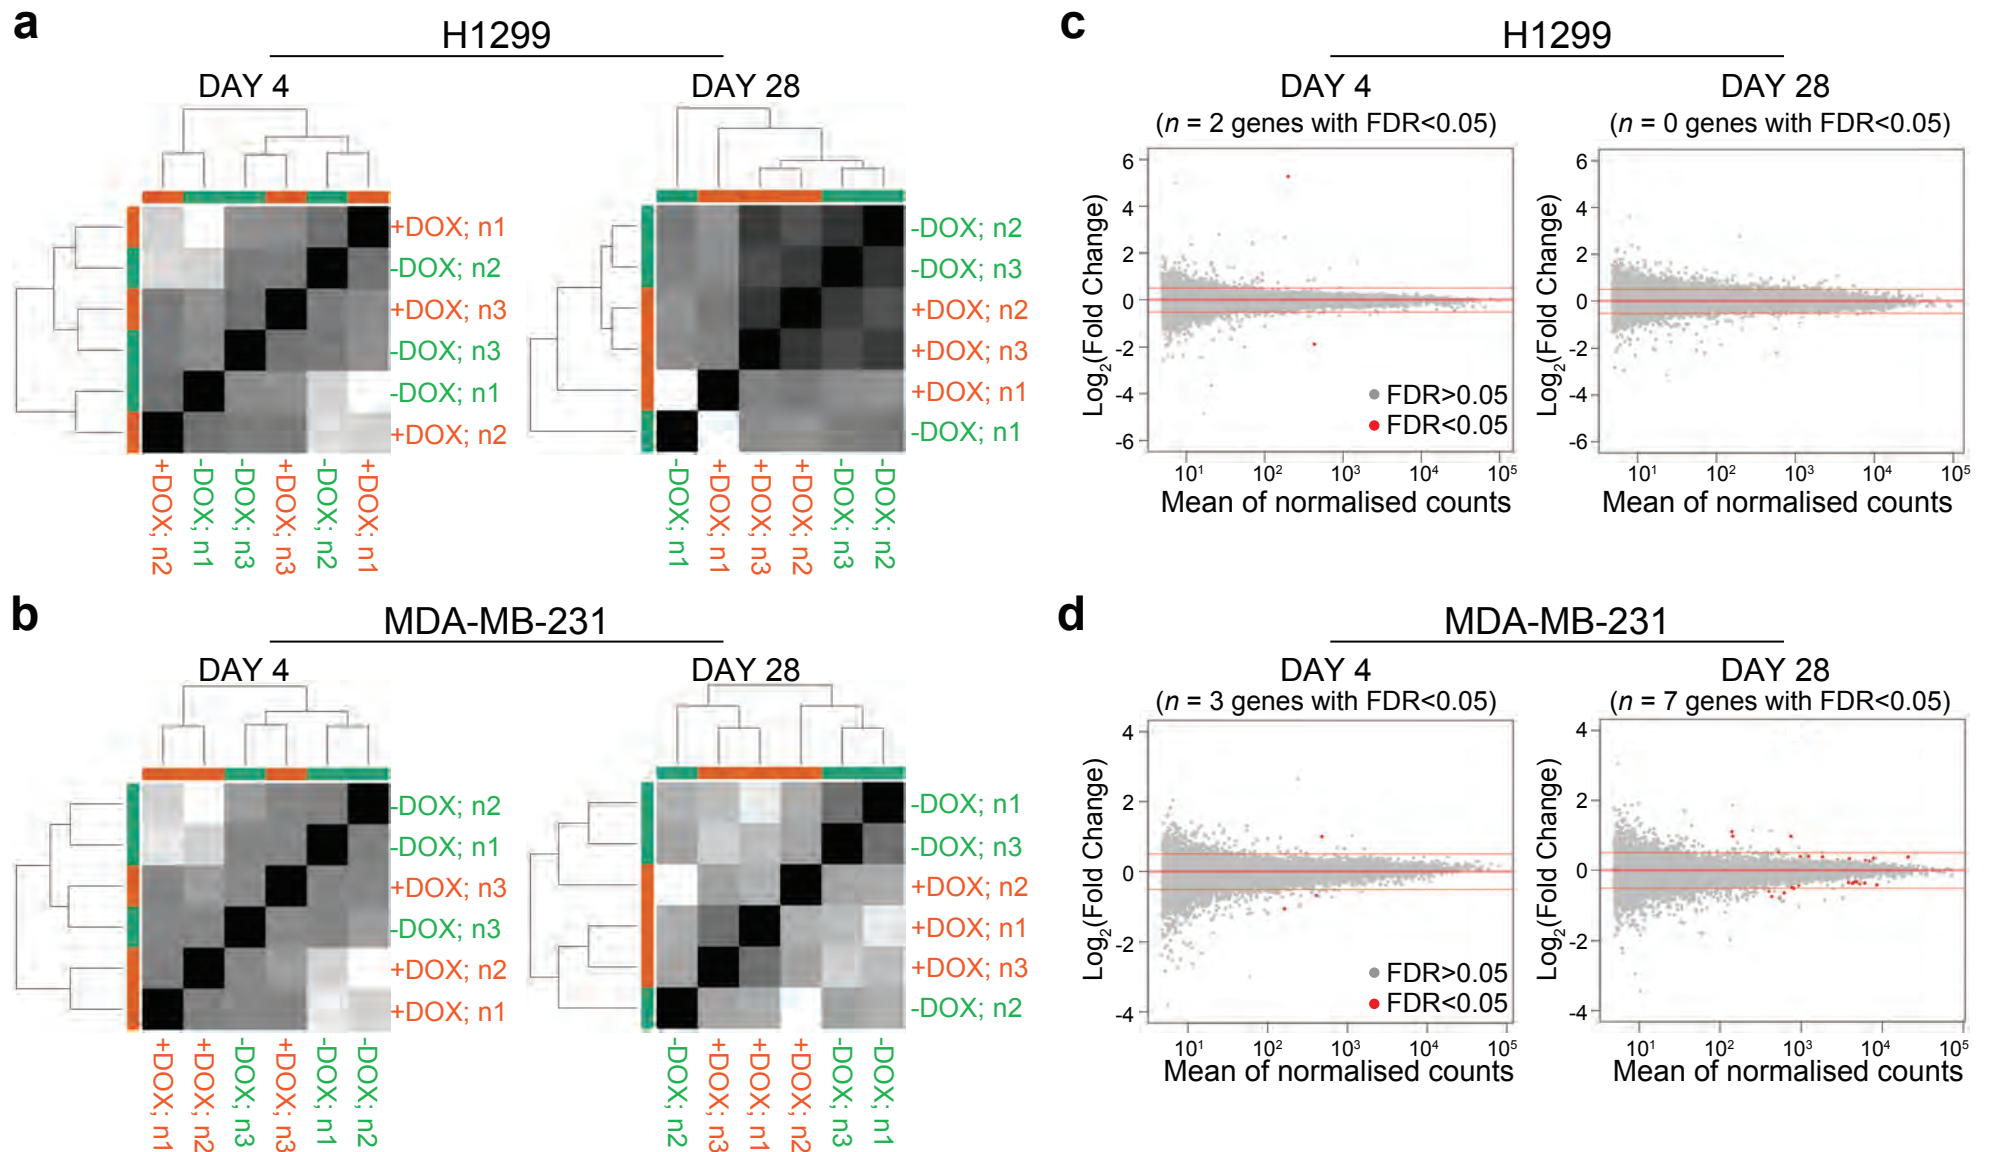

**Supplementary Figure 1. Doxycycline (DOX) treatment does not induce transcriptional changes in parental H1299 or MDA-MB-231 human cells.** (a, b) Euclidean sample-to-sample distances calculated from RNA-seq normalised count data for H1299 (a) and MDA-MB-231 (b) cells treated with 2  $\mu$ g/ml DOX for 4 or 28 days. Hierarchical clustering of distance matrices shows no clear distinction between +DOX and -DOX samples. (c, d) MA plots showing differentially expressed genes between +DOX and -DOX samples treated as in (a, b). Each dot represents one gene; red, genes with significantly altered expression values (FDR < 0.05); gray, genes without significantly altered expression values (FDR > 0.05).

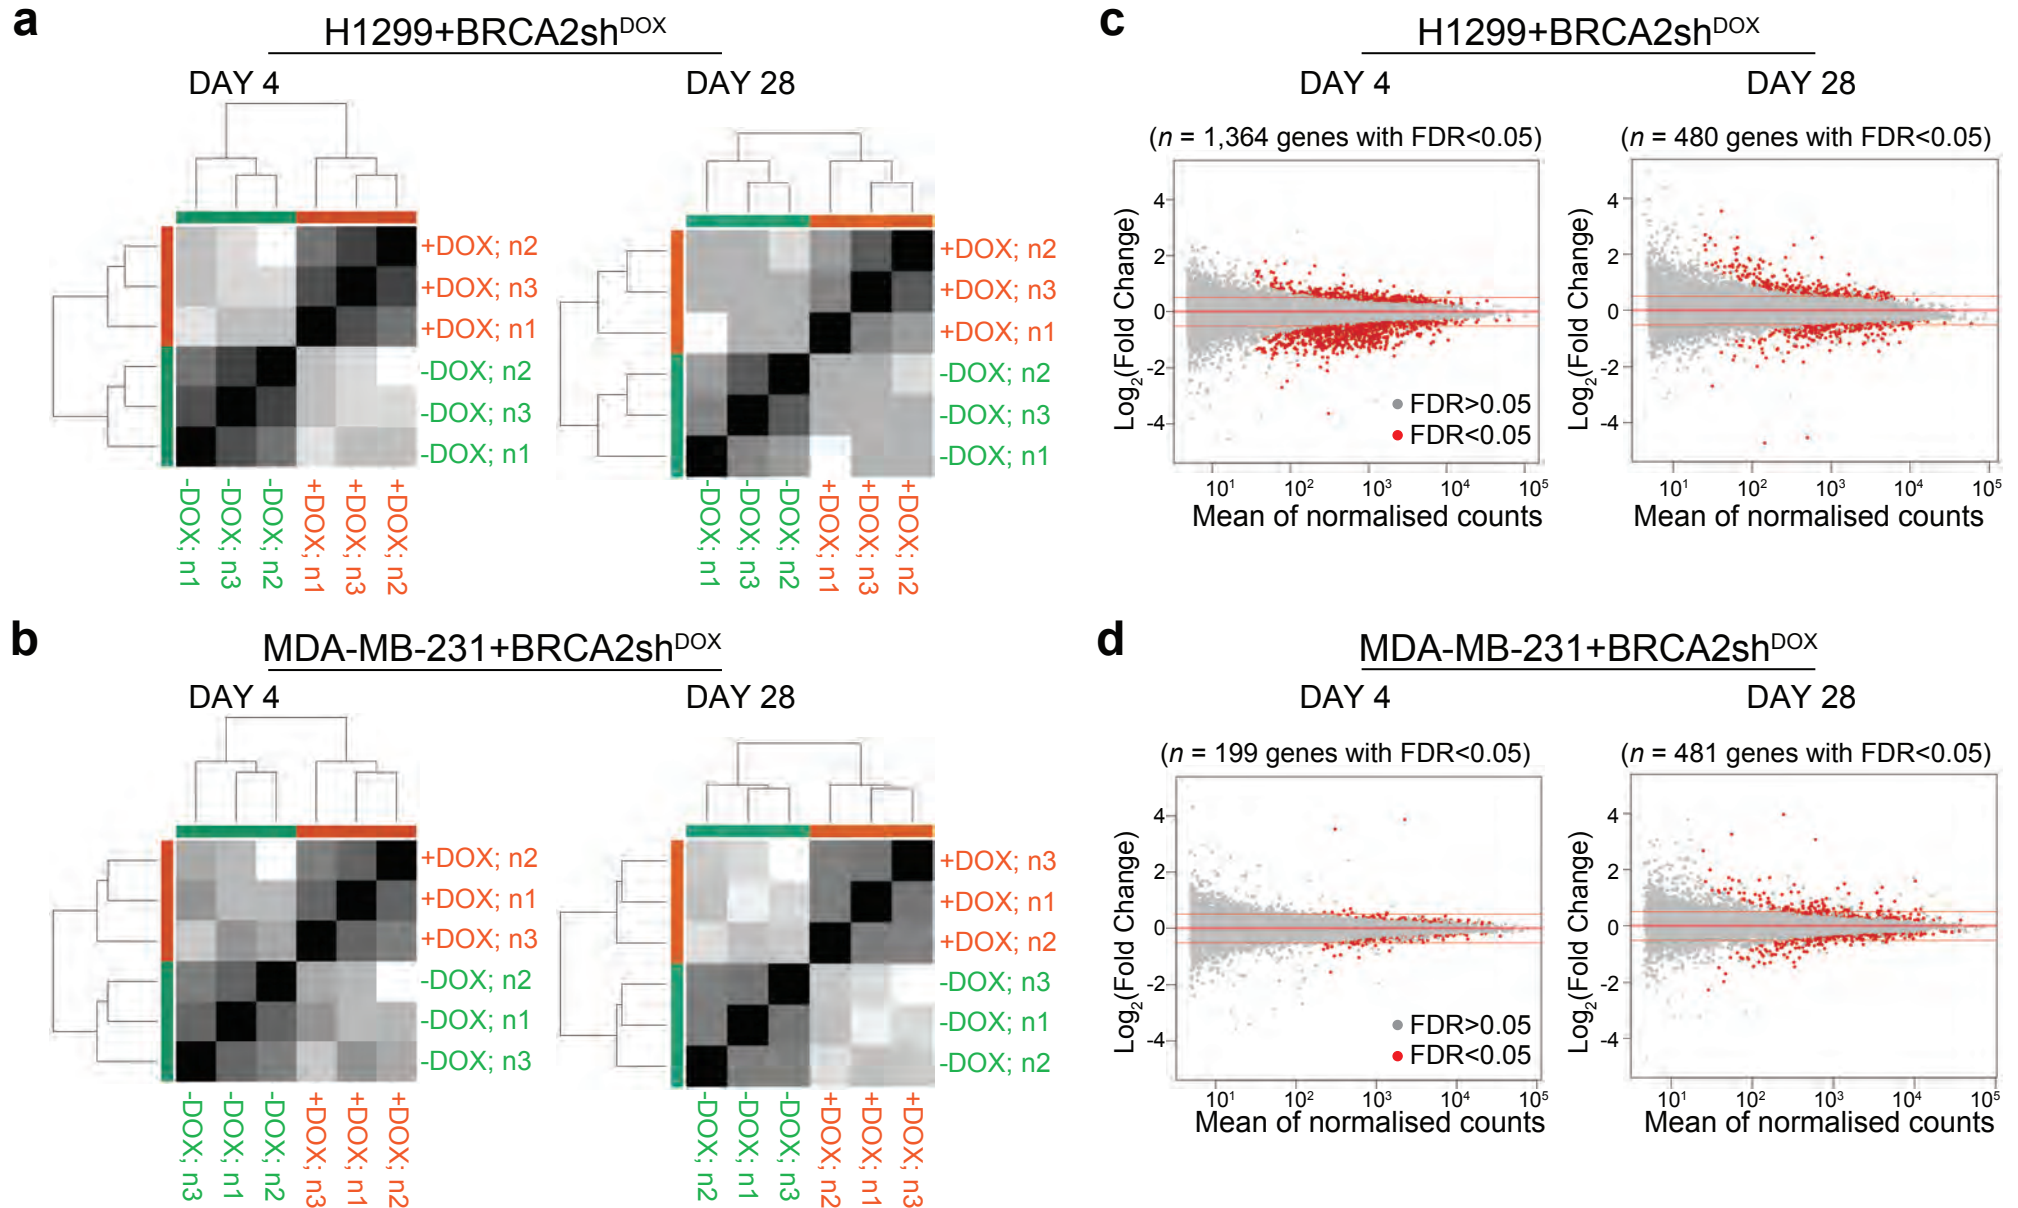

**Supplementary Figure 2. Doxycycline (DOX) treatment induces significant transcriptional changes in H1299 or MDA-MB-231 human cells expressing a DOX-inducible shRNA against *BRCA2*.** (a, b) Euclidean sample-to-sample distances calculated from RNA-seq normalized count data for H1299 (a) and MDA-MB-231 (b) cells carrying a DOX-inducible shRNA against *BRCA2*, treated with 2  $\mu$ g/ml DOX for 4 or 28 days. Hierarchical clustering of distance matrices shows a clear distinction between -DOX and +DOX samples. (c, d) MA plots showing differentially expressed genes between +DOX and -DOX samples treated as in (a, b). Each dot represents one gene; red, genes with significantly altered expression values (FDR < 0.05); gray, genes without significantly altered expression values (FDR > 0.05).

Reislander et al. - Supplementary Figure 3

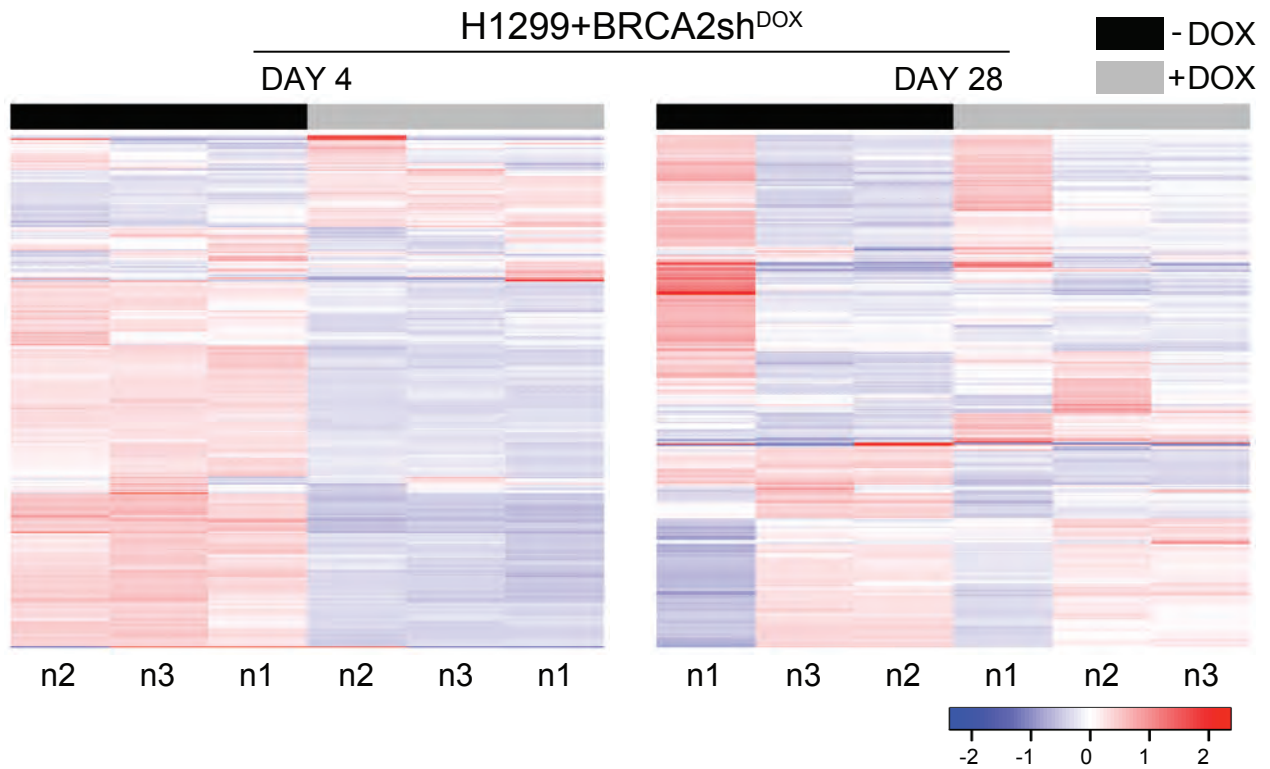

**Supplementary Figure 3. Supervised clustering of log-transformed gene counts.** Data were obtained from  $n = 3$  independent RNA-seq experiments performed in H1299 cells expressing a DOX-inducible shRNA against BRCA2. Top scoring 500 genes are shown.



Reislander et al. - Supplementary Figure 4

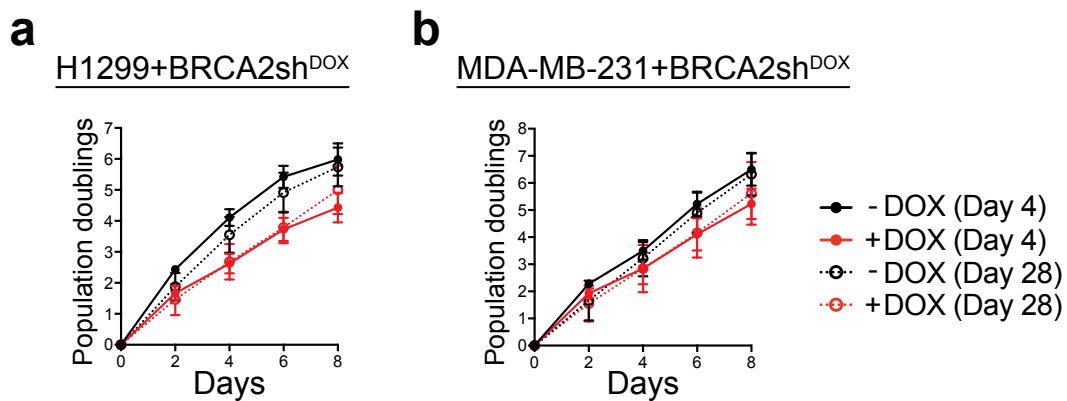

**Supplementary Figure 4. Proliferation capacity of H1299 and MDA-MB-231 cells upon short-term (4 days) or long-term (28 days) BRCA2 inactivation using a DOX-inducible shRNA.** Viability of H1299 (a) and MDA-MB-231 (b) cells was determined over a period of 8 days and reported to day 0 in order to calculate population doublings. Day 0 represents either day 4 (solid line) or day 28 (dotted line) after DOX addition. Error bars represent SD of  $n = 3$  independent experiments.

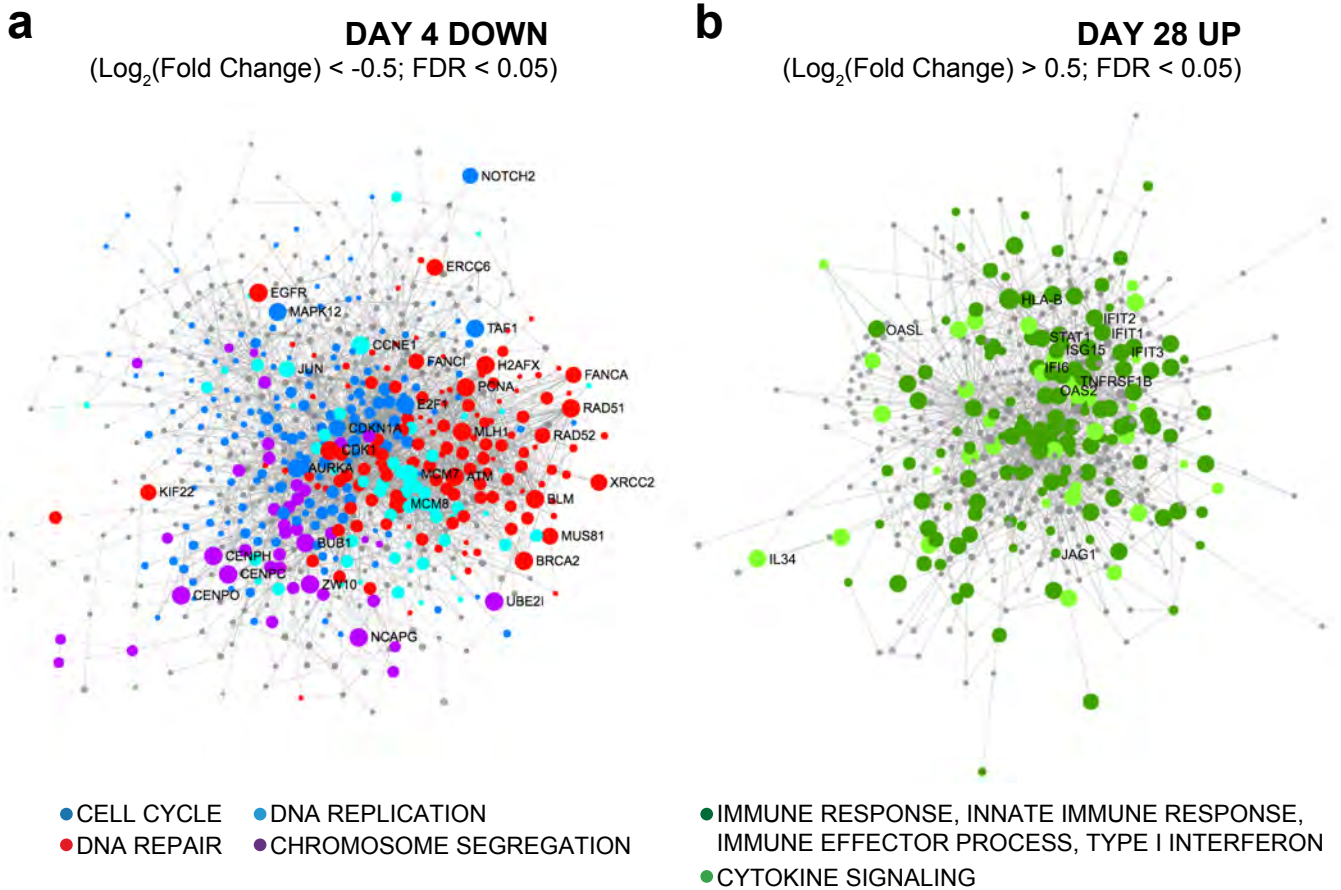

**Supplementary Figure 5. Protein-protein interaction networks in H1299 cells during short-term (4 days) or long-term (28 days) BRCA2 inactivation using a DOX-inducible shRNA.** First-order protein-protein interaction networks between genes downregulated after 4 days (a) or upregulated after 28 days (b) of DOX treatment. Node size is proportional to the number of its connections with other nodes. n = 574 downregulated genes (day 4) and n = 213 upregulated genes (day 28) were used for network analysis, resulting in 669 and 446 nodes, respectively.

**a**

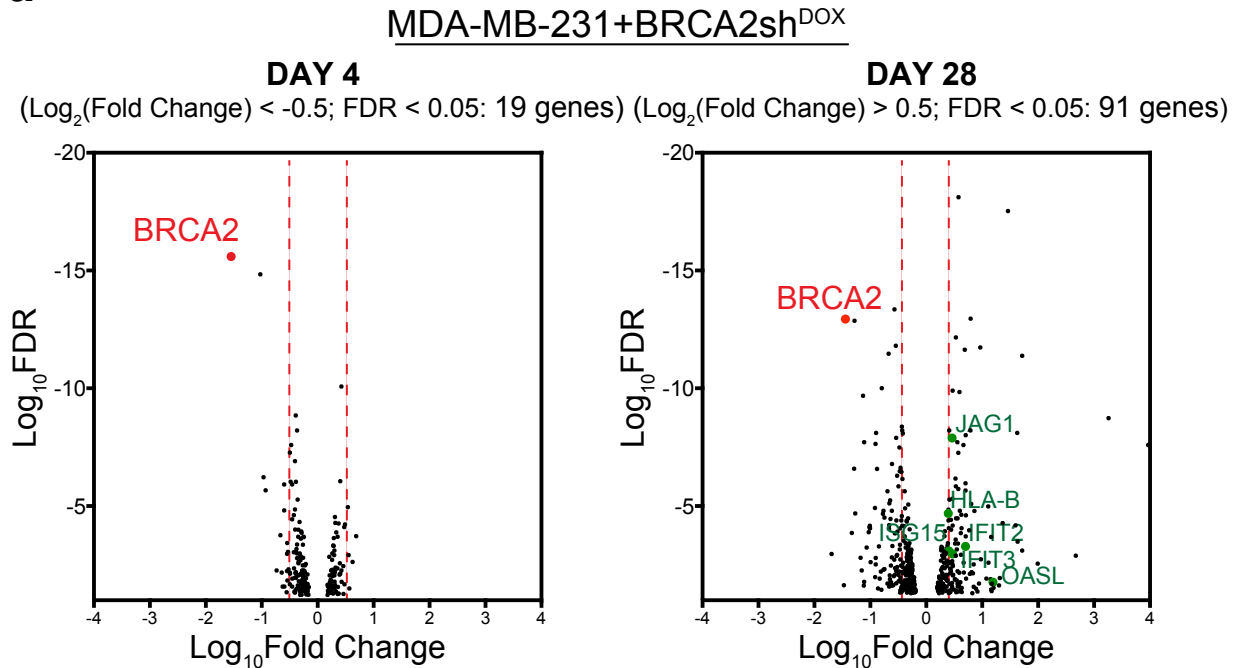

**b**

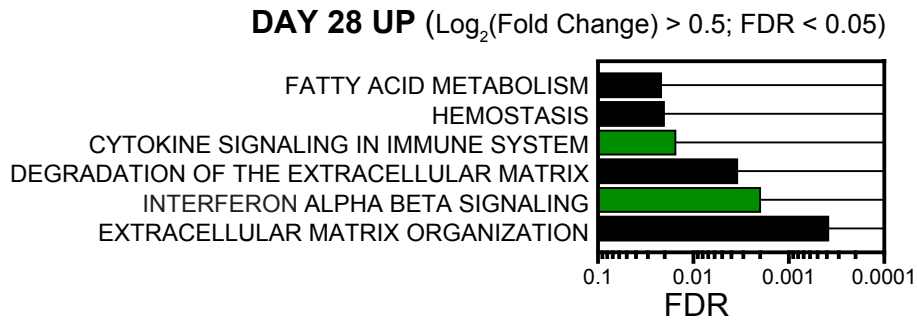

**Supplementary Figure 6. Differential gene expression analyses of MDA-MB-231 cells carrying a DOX-inducible shRNA targeting BRCA2.** (a) Volcano plot of genes differentially expressed (FDR < 0.05) in BRCA2-deficient (+DOX) versus BRCA2-proficient (-DOX) cells, assessed at day 4 or day 28 after DOX addition. (b) REACTOME pathway-based enrichment analysis of genes upregulated (Log<sub>2</sub>(Fold Change) > 0.5; FDR < 0.05) in +DOX relative to -DOX samples following 28 days of DOX treatment.

Reislander et al. - Supplementary Figure 7

DLD1 *BRCA2*<sup>-/-</sup> vs *BRCA2*<sup>+/+</sup>

UP (Log<sub>2</sub>(Fold Change) > 0.5; FDR < 0.05)

■ *BRCA2*<sup>+/+</sup> ■ *BRCA2*<sup>-/-</sup>

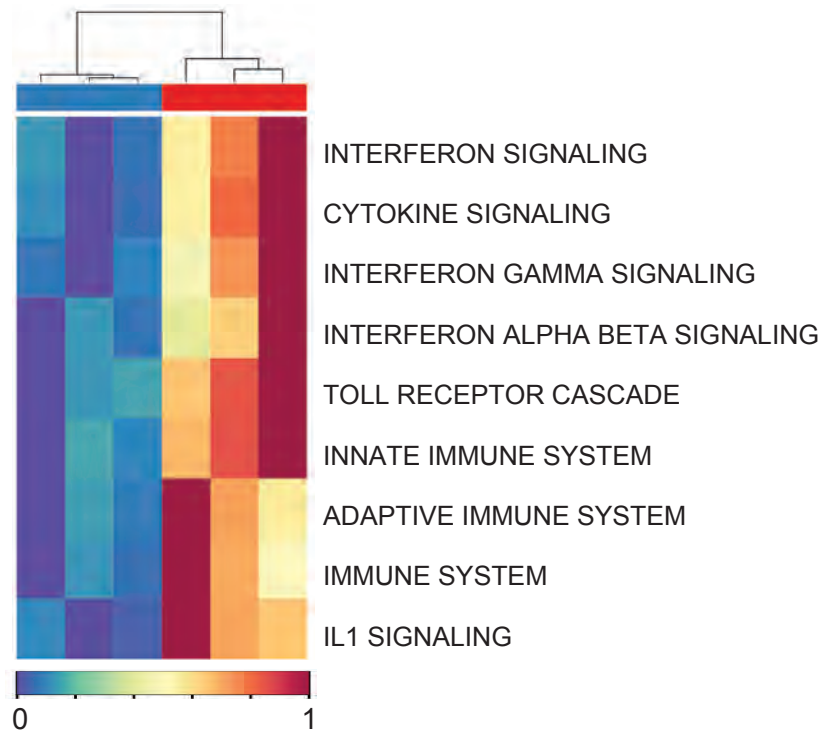

**Supplementary Figure 7. Pathway deregulation score analysis for genes significantly upregulated (Log<sub>2</sub>(Fold Change) > 0.5; FDR < 0.05) in *BRCA2*<sup>-/-</sup> vs *BRCA2*<sup>+/+</sup> DLD1 cells. Each row corresponds to a Reactome pathway and each column to an RNA-seq sample.**

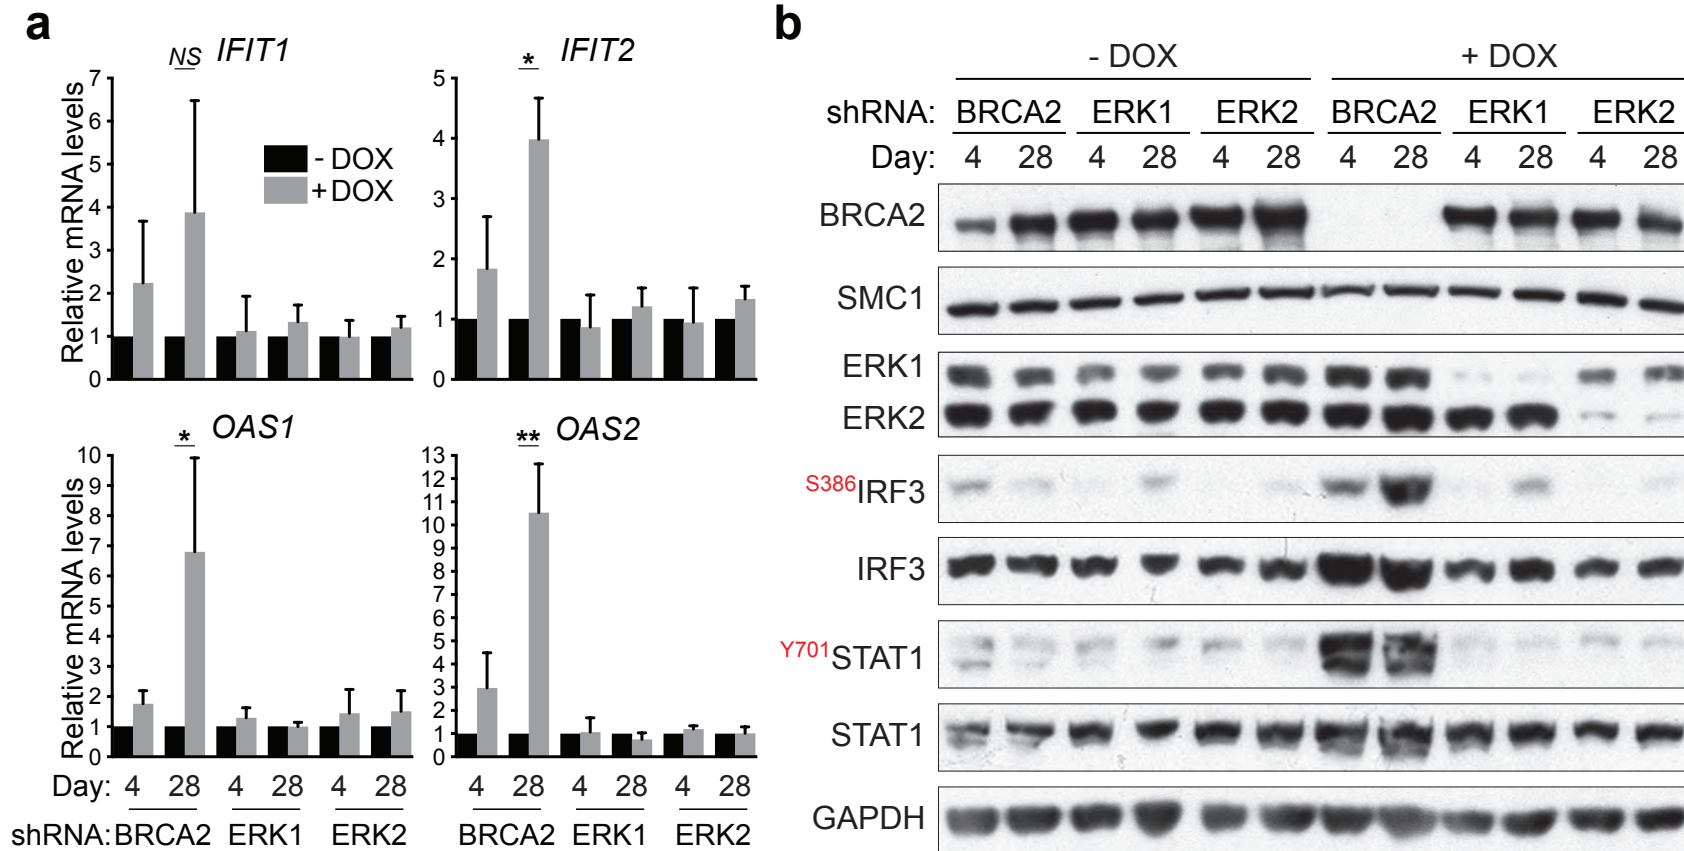

**Supplementary Figure 8. Upregulation of innate immune response genes is not triggered by ERK1 or ERK2 inactivation.** H1299 cells expressing a doxycycline (DOX)-inducible BRCA2 shRNA were grown in the presence or absence of DOX for 28 days. Cells were subjected to (a) quantitative RT-PCR analyses using primers specific for the indicated genes. mRNA levels were expressed relative to the gene encoding  $\beta$ -actin and to untreated (-DOX) controls ( $2^{-\Delta\Delta CT}$ ). Error bars represent SD of  $n = 3$  independent experiments, each performed in triplicates. NS,  $p > 0.05$ ; \*,  $p < 0.05$ ; \*\*,  $p < 0.01$  (unpaired two-tailed  $t$  test). (b) Whole cell extracts were immunoblotted as indicated. GAPDH and SMC1 were used as loading control. Phosphorylation sites are indicated in red.

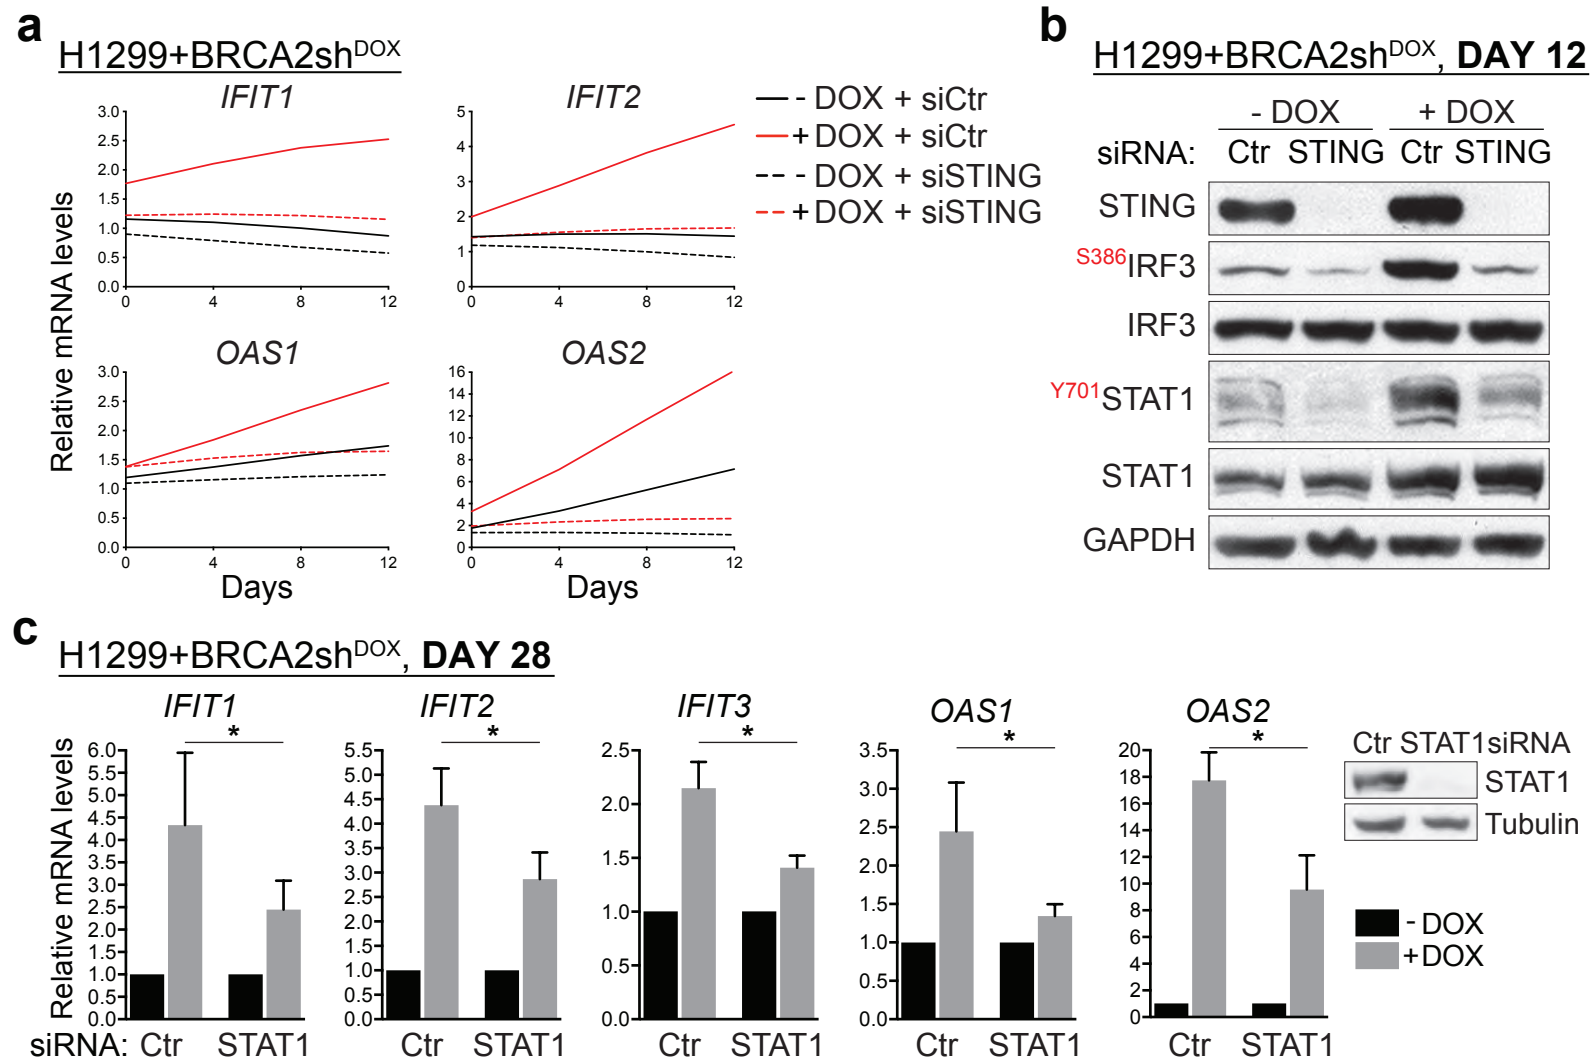

**Supplementary Figure 9. Upregulation of the innate immune response genes triggered by BRCA2 inactivation is STING and STAT1-dependent.** H1299 cells expressing a doxycycline (DOX)-inducible BRCA2 shRNA were grown in the presence or absence of DOX. (a, b) Cells transfected with STING siRNA every 4 days were subjected to (a) quantitative RT-PCR analyses using primers specific for the indicated genes. mRNA levels were expressed relative to the gene encoding  $\beta$ -actin and to day 0 ( $2^{-\Delta\Delta CT}$ ). (b) Whole cell extracts were immunoblotted as indicated. GAPDH was used as a loading control. Phosphorylation sites are indicated in red. (c) Upon 28 days of DOX treatment, cells were transfected with STAT1 siRNA for 48 hours and subjected to quantitative RT-PCR analyses using primers specific for the indicated genes. mRNA levels were expressed relative to the gene encoding  $\beta$ -actin and to untreated (-DOX) controls ( $2^{-\Delta\Delta CT}$ ). Error bars represent SD of  $n = 4$  independent experiments, each performed in triplicates. \*,  $p < 0.05$  (unpaired two-tailed  $t$  test). Whole cell extracts were immunoblotted as indicated. Tubulin was used as a loading control.



Reislander et al. - Supplementary Figure 10

Ovarian serous cystadenocarcinomas (TCGA,  $n = 316$ )

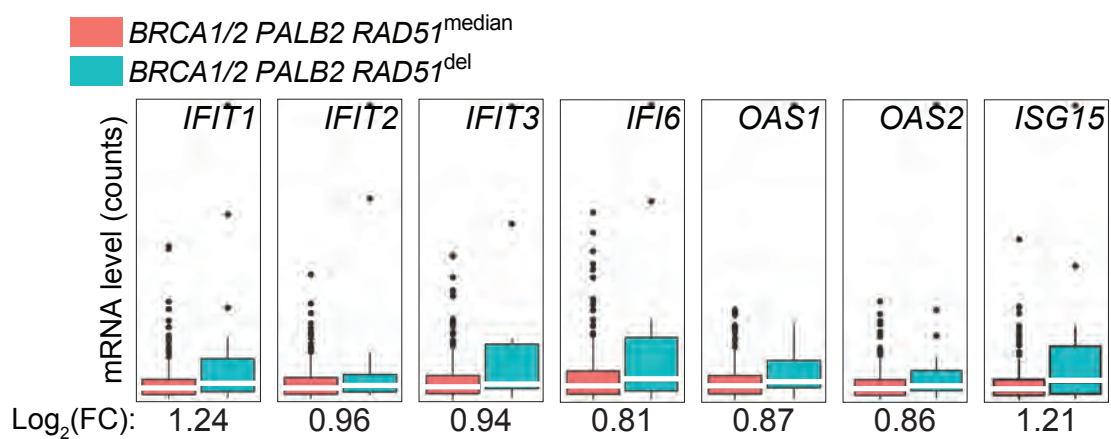

**Supplementary Figure 10. Upregulation of innate immune response genes in HR-deficient ovarian tumors.**

Upregulation of innate immune response genes in HR-deficient tumors (*BRCA1*-, *BRCA2*-, *PALB2*- or *RAD51*-deleted ovarian tumors;  $n = 17$ ) versus the group of tumours with median mRNA expression ( $n = 257$  samples). Dots in graphs represent individual tumors. Middle line (white), median; box limits 25 and 75 percentiles; whiskers, minimum and maximum values.
